# Supplementary material for: Preclinical QSP Modeling in the Pharmaceutical Industry: An IQ Consortium Survey Examining the Current Landscape
Source: PubMed Central journal article supplement — CPT Pharmacometrics Syst Pharmacol. 2018 Feb 1;7(3):135–46. doi: 10.1002/psp4.12282 (PMC5869550; doi:10.1002/psp4.12282), 2018-02-01
Supplement: PSP4-7-135-s001.pdf [file PSP4-7-135-s001.pdf]

**Table S1. Survey Questions and Responses**

| Question                                                                                                                                      | Answers                                                                                                                               | Responses (%) | # of Responses | # Skipped |
|-----------------------------------------------------------------------------------------------------------------------------------------------|---------------------------------------------------------------------------------------------------------------------------------------|---------------|----------------|-----------|
| 1. How many employees does your company have?                                                                                                 | < 500 employees                                                                                                                       | 6.25%         | 2              | 1         |
|                                                                                                                                               | 500-2,000 employees                                                                                                                   | 21.88%        | 7              |           |
|                                                                                                                                               | 2,001-10,000 employees                                                                                                                | 34.38%        | 11             |           |
|                                                                                                                                               | > 10,000 employees                                                                                                                    | 37.50%        | 12             |           |
| 2. What type of therapy is the focus at your company?                                                                                         | Primarily small molecules                                                                                                             | 40.63%        | 13             | 1         |
|                                                                                                                                               | Primarily biologics                                                                                                                   | 6.25%         | 2              |           |
|                                                                                                                                               | Mixed                                                                                                                                 | 53.13%        | 17             |           |
| 3. Which of the following therapeutic areas is the focus at your company (select all that apply)?                                             | Oncology                                                                                                                              | 57.58%        | 19             | 0         |
|                                                                                                                                               | Neuroscience                                                                                                                          | 66.67%        | 22             |           |
|                                                                                                                                               | Autoimmune disorders                                                                                                                  | 54.55%        | 18             |           |
|                                                                                                                                               | Infectious diseases                                                                                                                   | 33.33%        | 11             |           |
|                                                                                                                                               | Cardiovascular                                                                                                                        | 30.30%        | 10             |           |
|                                                                                                                                               | Metabolic disorders                                                                                                                   | 27.27%        | 9              |           |
|                                                                                                                                               | Rare diseases                                                                                                                         | 39.39%        | 13             |           |
| 4. How well defined is the term “quantitative systems pharmacology” (QSP) at your company?                                                    | The use of the term QSP to describe models is well defined; it is clear which models are QSP models and which are not.                | 18.18%        | 6              | 0         |
|                                                                                                                                               | The use of the term QSP to describe models is loosely defined; it is somewhat unclear which models are QSP models and which are not.  | 54.55%        | 18             |           |
|                                                                                                                                               | My company does not use the term QSP to describe its modeling activities or does not perform QSP modeling (internally or externally). | 27.27%        | 9              |           |
| The remaining questions were not answered by the 9 responders that indicated in question 4 that they do not use QSP modeling.                 |                                                                                                                                       |               |                |           |
| 5. As the term is used at your company, which of the following are typical or required characteristics of QSP models (select all that apply)? | QSP models include mechanistic detail on biological and/or therapeutic processes                                                      | 83.33%        | 20             | 9         |
|                                                                                                                                               | QSP models represent a complex, interconnected, and multi-scale system, described by variables and/or parameters                      | 58.33%        | 14             |           |
|                                                                                                                                               | QSP models utilize diverse types of data, including “-omics” data                                                                     | 41.67%        | 10             |           |
|                                                                                                                                               | QSP models incorporate effect of drugs, including PK if available                                                                     | 75.00%        | 18             |           |
|                                                                                                                                               | Other                                                                                                                                 | 16.67%        | 4              |           |
| 6. Which of the following models would your company define as a QSP model (select all that apply)?                                            | Mechanistic PK/PD models based on known/hypothesized biological/therapeutic mechanisms                                                | 79.17%        | 19             | 9         |
|                                                                                                                                               | Comprehensive model of known/hypothesized biological/therapeutic mechanisms, including feedbacks, and redundancies                    | 83.33%        | 20             |           |
|                                                                                                                                               | Mechanistic PBPK models                                                                                                               | 50.00%        | 12             |           |
|                                                                                                                                               | Mechanism-based pathway or signaling transduction models (e.g., deterministic ODE models)                                             | 83.33%        | 20             |           |
|                                                                                                                                               | Data-driven pathway or signaling transduction models (e.g., influence networks)                                                       | 41.67%        | 10             |           |
|                                                                                                                                               | Spatial-temporal models of drug delivery and/or effects (e.g., computational fluid dynamics models)                                   | 33.33%        | 8              |           |
|                                                                                                                                               | Quantitative structure–activity relationship (QSAR) models                                                                            | 0.00%         | 0              |           |
|                                                                                                                                               | Machine learning approaches (e.g., Bayesian networks) applied to biological problems                                                  | 8.33%         | 2              |           |
|                                                                                                                                               | Agent-based models applied to biological problems                                                                                     | 16.67%        | 4              |           |
|                                                                                                                                               | None of these are QSP models                                                                                                          | 0.00%         | 0              |           |
|                                                                                                                                               | Unsure (QSP is loosely defined)                                                                                                       | 20.83%        | 5              |           |
| 7. To what department do your preclinical QSP modelers belong (select all that apply)?                                                        | DMPK                                                                                                                                  | 58.33%        | 14             | 9         |
|                                                                                                                                               | Preclinical PKPD/Modeling & Simulation group                                                                                          | 41.67%        | 10             |           |
|                                                                                                                                               | Clinical Pharmacology                                                                                                                 | 29.17%        | 7              |           |
|                                                                                                                                               | Computational Biology/Bioinformatics                                                                                                  | 16.67%        | 4              |           |
|                                                                                                                                               | Statistics                                                                                                                            | 0.00%         | 0              |           |
|                                                                                                                                               | Discovery/Biology Research                                                                                                            | 8.33%         | 2              |           |
|                                                                                                                                               | Other                                                                                                                                 | 16.67%        | 4              |           |
| 8. What is the academic background of your company’s QSP modelers (select all that apply)?                                                    | Pharmacokinetics/Pharmaceutical Sciences                                                                                              | 75.00%        | 18             | 9         |
|                                                                                                                                               | Pharmacology                                                                                                                          | 41.67%        | 10             |           |
|                                                                                                                                               | Computational Biology/Bioinformatics                                                                                                  | 50.00%        | 12             |           |
|                                                                                                                                               | Engineering                                                                                                                           | 58.33%        | 14             |           |
|                                                                                                                                               | Computer Science                                                                                                                      | 16.67%        | 4              |           |
|                                                                                                                                               | Mathematics                                                                                                                           | 33.33%        | 8              |           |
|                                                                                                                                               | Statistics                                                                                                                            | 8.33%         | 2              |           |
|                                                                                                                                               | Physical Sciences                                                                                                                     | 25.00%        | 6              |           |
|                                                                                                                                               | Life Sciences                                                                                                                         | 29.17%        | 7              |           |
|                                                                                                                                               | Other background                                                                                                                      | 4.17%         | 1              |           |

| Question                                                                                                                       | Answers                                                                                                                                                                     | Responses (%) | # of Responses | # Skipped |
|--------------------------------------------------------------------------------------------------------------------------------|-----------------------------------------------------------------------------------------------------------------------------------------------------------------------------|---------------|----------------|-----------|
| 9. How many QSP modeling full-time equivalents (FTEs) does your company have?                                                  | < 1                                                                                                                                                                         | 37.50%        | 9              | 9         |
|                                                                                                                                | 1-2 FTE                                                                                                                                                                     | 16.67%        | 4              |           |
|                                                                                                                                | 3-5 FTE                                                                                                                                                                     | 8.33%         | 2              |           |
|                                                                                                                                | 6-10 FTE                                                                                                                                                                    | 25.00%        | 6              |           |
|                                                                                                                                | 10+ FTE                                                                                                                                                                     | 12.50%        | 3              |           |
| 10. Do you have staff assigned as part-time QSP modelers and if so, what other functions do they serve (select all that apply) | No                                                                                                                                                                          | 16.67%        | 4              | 9         |
|                                                                                                                                | Yes, statistics                                                                                                                                                             | 8.33%         | 2              |           |
|                                                                                                                                | Yes, pharmacometrics                                                                                                                                                        | 29.17%        | 7              |           |
|                                                                                                                                | Yes, preclinical PK/PD                                                                                                                                                      | 58.33%        | 14             |           |
|                                                                                                                                | Yes, clinical pharmacology                                                                                                                                                  | 41.67%        | 10             |           |
|                                                                                                                                | Yes, DMPK                                                                                                                                                                   | 45.83%        | 11             |           |
| 11. If "yes" is selected for Question 10, please provide the percentage of FTE used to develop or apply preclinical QSP models | Yes, other                                                                                                                                                                  | 8.33%         | 2              |           |
|                                                                                                                                | 0-25%                                                                                                                                                                       | 38.10%        | 8              | 12        |
|                                                                                                                                | 25-50%                                                                                                                                                                      | 38.10%        | 8              |           |
|                                                                                                                                | 50-75%                                                                                                                                                                      | 9.52%         | 2              |           |
|                                                                                                                                | 75-100%                                                                                                                                                                     | 9.52%         | 2              |           |
| 12. How are QSP modelers in your company organized?                                                                            | Not applicable                                                                                                                                                              | 4.76%         | 1              |           |
|                                                                                                                                | Centralized                                                                                                                                                                 | 41.67%        | 10             | 9         |
|                                                                                                                                | Divided into therapeutic areas                                                                                                                                              | 8.33%         | 2              |           |
|                                                                                                                                | Divided into different geographic regions                                                                                                                                   | 8.33%         | 2              |           |
|                                                                                                                                | Other organizational structure                                                                                                                                              | 41.67%        | 10             |           |
| 13. How do QSP modelers in your company interact with project teams?                                                           | Direct (modeler is integral part/member of project team)                                                                                                                    | 20.83%        | 5              | 9         |
|                                                                                                                                | Indirect (modeler provides support only as requested by project team member)                                                                                                | 29.17%        | 7              |           |
|                                                                                                                                | Both, dependent on project or development stage                                                                                                                             | 50.00%        | 12             |           |
| 14. How many QSP projects are typically supported simultaneously per (part-time or full-time) QSP modeler?                     | 1                                                                                                                                                                           | 25.00%        | 6              | 9         |
|                                                                                                                                | 2                                                                                                                                                                           | 45.83%        | 11             |           |
|                                                                                                                                | 3                                                                                                                                                                           | 20.83%        | 5              |           |
|                                                                                                                                | 4                                                                                                                                                                           | 0.00%         | 0              |           |
|                                                                                                                                | >4                                                                                                                                                                          | 8.33%         | 2              |           |
| 15. At what stage is QSP modeling currently initiated in your company (select all that apply)?                                 | Target validation                                                                                                                                                           | 39.13%        | 9              | 10        |
|                                                                                                                                | Lead identification                                                                                                                                                         | 21.74%        | 5              |           |
|                                                                                                                                | Lead optimization (LO)                                                                                                                                                      | 43.48%        | 10             |           |
|                                                                                                                                | Clinical candidate selection (pre-IND)                                                                                                                                      | 73.91%        | 17             |           |
|                                                                                                                                | Clinical development (post-IND)                                                                                                                                             | 60.87%        | 14             |           |
| 16. Regarding the timing in which preclinical QSP modeling is done, please select all that apply.                              | Modeling is initiated to facilitate/support preclinical experimental study design                                                                                           | 45.83%        | 11             | 9         |
|                                                                                                                                | Modeling is initiated to help interpret and analyze preclinical experimental data in general                                                                                | 83.33%        | 20             |           |
|                                                                                                                                | Modeling is initiated only when unexpected preclinical experimental results are obtained                                                                                    | 20.83%        | 5              |           |
|                                                                                                                                | Modeling is initiated to facilitate/support planning for First in Human studies                                                                                             | 66.67%        | 16             |           |
|                                                                                                                                | Not applicable (my company does not use preclinical QSP modeling, only clinical)                                                                                            | 4.17%         | 1              |           |
| 17. How does your company share QSP models internally/externally (select all that apply)?                                      | As standalone executable tool                                                                                                                                               | 20.83%        | 5              | 9         |
|                                                                                                                                | As open-source code                                                                                                                                                         | 33.33%        | 8              |           |
|                                                                                                                                | As commercial code (e.g., MATLAB script)                                                                                                                                    | 62.50%        | 15             |           |
|                                                                                                                                | As mathematical descriptions                                                                                                                                                | 33.33%        | 8              |           |
|                                                                                                                                | As markup language model (e.g., SBML, CellML)                                                                                                                               | 25.00%        | 6              |           |
|                                                                                                                                | Other                                                                                                                                                                       | 8.33%         | 2              |           |
| 18. If your company's QSP modelers are divided between preclinical and clinical, how is information shared typically?          | Not applicable (company does not share QSP models)                                                                                                                          | 16.67%        | 4              |           |
|                                                                                                                                | We have a shared database of models and data with open access to both preclinical and clinical modelers                                                                     | 0.00%         | 0              | 10        |
|                                                                                                                                | There is an official hand-off of models, data and reports, which ends the involvement of the preclinical modelers                                                           | 0.00%         | 0              |           |
|                                                                                                                                | There is a gradual hand-off of models, data and reports, with the preclinical modeler working with the clinical team to keep developing the model for clinical applications | 13.04%        | 3              |           |
|                                                                                                                                | There is no formal process to transfer knowledge from preclinical to clinical                                                                                               | 39.13%        | 9              |           |
|                                                                                                                                | Not applicable (company does not have separate preclinical and clinical QSP modelers)                                                                                       | 47.83%        | 11             |           |

| Question                                                                                                                               | Answers                                                                                                                                                                                                                            | Responses (%) | # of Responses | # Skipped |
|----------------------------------------------------------------------------------------------------------------------------------------|------------------------------------------------------------------------------------------------------------------------------------------------------------------------------------------------------------------------------------|---------------|----------------|-----------|
| 19. If there is an official hand-off between preclinical and clinical modelers, at what stage does this occur (select all that apply)? | Pre IND/FIH                                                                                                                                                                                                                        | 26.09%        | 6              | 10        |
|                                                                                                                                        | Pre Phase II POC                                                                                                                                                                                                                   | 0.00%         | 0              |           |
|                                                                                                                                        | Post Phase II POC                                                                                                                                                                                                                  | 0.00%         | 0              |           |
|                                                                                                                                        | Not applicable: preclinical and clinical QSP modelers typically work together collaboratively                                                                                                                                      | 17.39%        | 4              |           |
|                                                                                                                                        | Not applicable: company does not have separate preclinical and clinical QSP modelers or official hand-off                                                                                                                          | 56.52%        | 13             |           |
| 20. Does your company utilize “-omics” (genomics, transcriptomics, proteomics, metabolomics, physiomics) data in QSP models?           | Often                                                                                                                                                                                                                              | 4.17%         | 1              | 9         |
|                                                                                                                                        | Sometimes                                                                                                                                                                                                                          | 16.67%        | 4              |           |
|                                                                                                                                        | Rarely                                                                                                                                                                                                                             | 50.00%        | 12             |           |
|                                                                                                                                        | Never                                                                                                                                                                                                                              | 29.17%        | 7              |           |
| 21. Are in-house and/or CRO experiments specifically designed to support QSP modeling activities (e.g., parameter estimation)?         | Often                                                                                                                                                                                                                              | 8.33%         | 2              | 9         |
|                                                                                                                                        | Sometimes                                                                                                                                                                                                                          | 50.00%        | 12             |           |
|                                                                                                                                        | Rarely                                                                                                                                                                                                                             | 25.00%        | 6              |           |
|                                                                                                                                        | Never                                                                                                                                                                                                                              | 16.67%        | 4              |           |
| 22. Which of the following software tool/languages do you use for QSP modeling (select all that apply)?                                | Specialized systems biology/physiology/pharmacology toolbox/software or markup languages (e.g., MATLAB® SimBiology®, Entelos PhysioLab®, Immunetrics Biosimulation Platform/Aegis, DBSolveOptimum, JDesigner, Bayer’s MoBi®, etc.) | 79.17%        | 19             | 9         |
|                                                                                                                                        | PBPK software tools (e.g., Simcyp®, GastroPlus, Bayer’s PK-Sim®)                                                                                                                                                                   | 45.83%        | 11             |           |
|                                                                                                                                        | PK/PD modeling tools (e.g., Phoenix® WinNonlin®, Berkeley Madonna, SAAM II, ADAPT 5)                                                                                                                                               | 62.50%        | 15             |           |
|                                                                                                                                        | Population PK/PD modeling tools (e.g., Phoenix® NLME, NONMEM®, Monolix®, etc.)                                                                                                                                                     | 50.00%        | 12             |           |
|                                                                                                                                        | General engineering, computational or statistical languages/tools (e.g., MATLAB®, Mathematica®/SystemModeler, C/C++, Java, Python®, FORTRAN, R, SAS®, SPLus®, etc.)                                                                | 70.83%        | 17             |           |
|                                                                                                                                        | Others                                                                                                                                                                                                                             | 8.33%         | 2              |           |
|                                                                                                                                        | Not Sure                                                                                                                                                                                                                           | 0.00%         | 0              |           |
|                                                                                                                                        |                                                                                                                                                                                                                                    |               |                |           |
| 23. What type of QSP models does your company develop or plan to develop?                                                              | Fit-for-purpose models (project specific, focused/pathway specific)                                                                                                                                                                | 33.33%        | 8              | 9         |
|                                                                                                                                        | Platform models (comprehensive model of a disease/therapeutic area)                                                                                                                                                                | 0.00%         | 0              |           |
|                                                                                                                                        | Both types of models                                                                                                                                                                                                               | 62.50%        | 15             |           |
|                                                                                                                                        | Other                                                                                                                                                                                                                              | 4.17%         | 1              |           |
| 24. What biological scales are QSP models at your company typically focused on (select all that apply)?                                | Gene level                                                                                                                                                                                                                         | 8.33%         | 2              | 9         |
|                                                                                                                                        | Pathway level                                                                                                                                                                                                                      | 75.00%        | 18             |           |
|                                                                                                                                        | Organelle level                                                                                                                                                                                                                    | 16.67%        | 4              |           |
|                                                                                                                                        | Cell level                                                                                                                                                                                                                         | 58.33%        | 14             |           |
|                                                                                                                                        | Tissue level                                                                                                                                                                                                                       | 66.67%        | 16             |           |
|                                                                                                                                        | Organ level                                                                                                                                                                                                                        | 83.33%        | 20             |           |
|                                                                                                                                        | Whole body level                                                                                                                                                                                                                   | 70.83%        | 17             |           |
|                                                                                                                                        | Patient populations                                                                                                                                                                                                                | 62.50%        | 15             |           |
| Not sure                                                                                                                               | 8.33%                                                                                                                                                                                                                              | 2             |                |           |
| 25. How is the quality or reliability of your preclinical QSP models assessed (select all that apply)?                                 | Diagnostic plots/statistical tests                                                                                                                                                                                                 | 50.00%        | 12             | 9         |
|                                                                                                                                        | Perform sensitivity analyses                                                                                                                                                                                                       | 70.83%        | 17             |           |
|                                                                                                                                        | Utilize uncertainty quantification methodologies                                                                                                                                                                                   | 29.17%        | 7              |           |
|                                                                                                                                        | Validation simulations                                                                                                                                                                                                             | 83.33%        | 20             |           |
|                                                                                                                                        | Assessed by other modelers                                                                                                                                                                                                         | 45.83%        | 11             |           |
|                                                                                                                                        | Evaluated by biological plausibility by non-modelers                                                                                                                                                                               | 70.83%        | 17             |           |
| None                                                                                                                                   | 4.17%                                                                                                                                                                                                                              | 1             |                |           |
| 26. How many variables are typical of preclinical QSP models developed at your company?                                                | < 20                                                                                                                                                                                                                               | 26.09%        | 6              | 10        |
|                                                                                                                                        | 20-50                                                                                                                                                                                                                              | 21.74%        | 5              |           |
|                                                                                                                                        | 50-100                                                                                                                                                                                                                             | 21.74%        | 5              |           |
|                                                                                                                                        | > 100                                                                                                                                                                                                                              | 30.43%        | 7              |           |
| 27. How long does your company typically spend on building a QSP model (select all that apply)?                                        | 1-3 weeks                                                                                                                                                                                                                          | 12.50%        | 3              | 9         |
|                                                                                                                                        | 3-6 weeks                                                                                                                                                                                                                          | 20.83%        | 5              |           |
|                                                                                                                                        | 6-12 weeks                                                                                                                                                                                                                         | 29.17%        | 7              |           |
|                                                                                                                                        | 3-6 months                                                                                                                                                                                                                         | 37.50%        | 9              |           |
|                                                                                                                                        | 6-12 months                                                                                                                                                                                                                        | 50.00%        | 12             |           |
|                                                                                                                                        | 12+ months                                                                                                                                                                                                                         | 37.50%        | 9              |           |
| 28. What is your company’s typical process for developing a QSP model (select all that apply)?                                         | In-house development from fundamental components                                                                                                                                                                                   | 50.00%        | 12             | 9         |
|                                                                                                                                        | In-house development based on published models                                                                                                                                                                                     | 62.50%        | 15             |           |
|                                                                                                                                        | External collaborations with academia or others                                                                                                                                                                                    | 37.50%        | 9              |           |
|                                                                                                                                        | Contract with CROs                                                                                                                                                                                                                 | 54.17%        | 13             |           |
|                                                                                                                                        | Both internal and external model development                                                                                                                                                                                       | 45.83%        | 11             |           |

| Question                                                                                                                      | Answers                                                                                                             | Responses (%) | # of Responses | # Skipped |
|-------------------------------------------------------------------------------------------------------------------------------|---------------------------------------------------------------------------------------------------------------------|---------------|----------------|-----------|
| 29. In your company, preclinical QSP modeling is used for which of the following purposes (select your top 5 answers)?        | Target identification, validation, or optimization                                                                  | 25.00%        | 6              | 9         |
|                                                                                                                               | Compound selection, optimization and prioritization                                                                 | 50.00%        | 12             |           |
|                                                                                                                               | Biomarker identification, validation, translation and further analyses                                              | 50.00%        | 12             |           |
|                                                                                                                               | Go/no-go decision making                                                                                            | 33.33%        | 8              |           |
|                                                                                                                               | Design preclinical experimental studies                                                                             | 41.67%        | 10             |           |
|                                                                                                                               | Assess hypotheses for (patho)physiological, toxicological, and/or therapeutic mechanisms                            | 70.83%        | 17             |           |
|                                                                                                                               | Address internal or regulatory questions about unexpected PK/PD behaviors                                           | 25.00%        | 6              |           |
|                                                                                                                               | Compare with competitor compounds                                                                                   | 45.83%        | 11             |           |
|                                                                                                                               | Optimize clinical PoC doses and/or dose regimens                                                                    | 50.00%        | 12             |           |
|                                                                                                                               | Address questions regarding special population including pediatrics                                                 | 25.00%        | 6              |           |
|                                                                                                                               | Optimize clinical trial design (including drug/biomarker sampling times and patient selection)                      | 29.17%        | 7              |           |
|                                                                                                                               | Predict efficacy in clinical trials                                                                                 | 54.17%        | 13             |           |
|                                                                                                                               | Optimize approved drugs                                                                                             | 8.33%         | 2              |           |
|                                                                                                                               | Suggest companion diagnostics                                                                                       | 4.17%         | 1              |           |
| Assess safety/toxicology                                                                                                      | 25.00%                                                                                                              | 6             |                |           |
| Other                                                                                                                         | 4.17%                                                                                                               | 1             |                |           |
| 30. How would you describe the application of QSP modeling across therapeutic areas in your company?                          | Applied in all therapeutic areas                                                                                    | 16.67%        | 4              | 9         |
|                                                                                                                               | Broadly applied, but not in all therapeutic areas                                                                   | 33.33%        | 8              |           |
|                                                                                                                               | Application limited to one or two therapeutic areas                                                                 | 50.00%        | 12             |           |
| 31. In what therapeutic area does QSP modeling provide the most support in your organization (select all that apply)?         | Oncology                                                                                                            | 50.00%        | 12             | 9         |
|                                                                                                                               | Neuroscience                                                                                                        | 16.67%        | 4              |           |
|                                                                                                                               | Autoimmune disorders                                                                                                | 50.00%        | 12             |           |
|                                                                                                                               | Infectious diseases                                                                                                 | 8.33%         | 2              |           |
|                                                                                                                               | Cardiovascular                                                                                                      | 16.67%        | 4              |           |
|                                                                                                                               | Metabolic disorders                                                                                                 | 25.00%        | 6              |           |
|                                                                                                                               | Rare diseases                                                                                                       | 29.17%        | 7              |           |
|                                                                                                                               | Other                                                                                                               | 20.83%        | 5              |           |
| None                                                                                                                          | 4.17%                                                                                                               | 1             |                |           |
| 32. What is the general view within your company on the importance/impact of QSP modeling?                                    | Very important/impactful                                                                                            | 29.17%        | 7              | 9         |
|                                                                                                                               | Somewhat important/impactful                                                                                        | 58.33%        | 14             |           |
|                                                                                                                               | Not important/impactful                                                                                             | 8.33%         | 2              |           |
|                                                                                                                               | Not sure                                                                                                            | 4.17%         | 1              |           |
| 33. Where QSP has been successful, what have been the main reasons for it being judged a success (select all that apply)?     | Impacting projects with timely and sufficient modeling support                                                      | 66.67%        | 16             | 9         |
|                                                                                                                               | Management or decision maker interest                                                                               | 54.17%        | 13             |           |
|                                                                                                                               | Inclusion in regulatory documents and regulatory agency interest                                                    | 25.00%        | 6              |           |
|                                                                                                                               | Modeling findings supported by literature and experimental data                                                     | 54.17%        | 13             |           |
|                                                                                                                               | Model development/validation/uncertainty well performed or documented                                               | 29.17%        | 7              |           |
|                                                                                                                               | Addressing the clearly defined problems within the intended scope                                                   | 66.67%        | 16             |           |
| Preclinical QSP work typically get presented at governance meetings                                                           | 25.00%                                                                                                              | 6             |                |           |
| 34. Where QSP has failed to deliver, what have been the main reasons for it being judged a failure (select all that apply)?   | Limited impacts due to delayed or insufficient modeling support (lack of resources, including funding or expertise) | 56.52%        | 13             | 10        |
|                                                                                                                               | Lack of interest from management or internal decision makers (cost/benefit)                                         | 56.52%        | 13             |           |
|                                                                                                                               | Lack of interest from regulatory agencies                                                                           | 4.35%         | 1              |           |
|                                                                                                                               | Modeling findings not supported by literature and experimental data                                                 | 30.43%        | 7              |           |
|                                                                                                                               | Model development/validation/uncertainty poorly performed or documented                                             | 17.39%        | 4              |           |
|                                                                                                                               | Not addressing clearly defined problems within the intended scope                                                   | 47.83%        | 11             |           |
| 35. Has the use of preclinical QSP modeling impacted communication/alignment around biological concepts within project teams? | Yes, it has had a positive impact on team communication/alignment                                                   | 66.67%        | 16             | 9         |
|                                                                                                                               | Yes, it has had a negative impact on team communication/alignment                                                   | 0.00%         | 0              |           |
|                                                                                                                               | No, QSP modeling has not influenced team communication/alignment                                                    | 33.33%        | 8              |           |
| 36. When was preclinical QSP first explored in your company?                                                                  | Before 2005                                                                                                         | 8.33%         | 2              | 9         |
|                                                                                                                               | 2005-2010                                                                                                           | 25.00%        | 6              |           |
|                                                                                                                               | 2011-2015                                                                                                           | 50.00%        | 12             |           |
|                                                                                                                               | 2016 - present                                                                                                      | 16.67%        | 4              |           |
| 37. How many projects does QSP significantly impact per year?                                                                 | 0                                                                                                                   | 16.67%        | 4              | 9         |
|                                                                                                                               | 1 - 2                                                                                                               | 29.17%        | 7              |           |
|                                                                                                                               | 3 - 4                                                                                                               | 12.50%        | 3              |           |
|                                                                                                                               | 5 - 10                                                                                                              | 29.17%        | 7              |           |
|                                                                                                                               | >10                                                                                                                 | 12.50%        | 3              |           |
| 38. Does QSP work make it into regulatory submission documents?                                                               | Frequently                                                                                                          | 16.67%        | 4              | 9         |
|                                                                                                                               | Sometimes                                                                                                           | 8.33%         | 2              |           |
|                                                                                                                               | Rarely                                                                                                              | 29.17%        | 7              |           |
|                                                                                                                               | Never                                                                                                               | 45.83%        | 11             |           |

| Question                                                                                                                                                                                          | Answers                                                                                                                                                         | Responses (%) | # of Responses | # Skipped |
|---------------------------------------------------------------------------------------------------------------------------------------------------------------------------------------------------|-----------------------------------------------------------------------------------------------------------------------------------------------------------------|---------------|----------------|-----------|
| 39. If QSP is included in regulatory documents, how is it used (select all that apply)?                                                                                                           | As sole supporting evidence                                                                                                                                     | 4.17%         | 1              | 9         |
|                                                                                                                                                                                                   | Supporting Human Efficacious Dose prediction                                                                                                                    | 66.67%        | 16             |           |
|                                                                                                                                                                                                   | Supporting safety assessment                                                                                                                                    | 29.17%        | 7              |           |
|                                                                                                                                                                                                   | Proposing a registration (trial) dose                                                                                                                           | 20.83%        | 5              |           |
|                                                                                                                                                                                                   | To support other arguments                                                                                                                                      | 33.33%        | 8              |           |
|                                                                                                                                                                                                   | Not applicable                                                                                                                                                  | 33.33%        | 8              |           |
| 40. At your company, how do you anticipate the number of QSP modelers changing over the next two years?                                                                                           | Increasing                                                                                                                                                      | 58.33%        | 14             | 9         |
|                                                                                                                                                                                                   | Stable                                                                                                                                                          | 37.50%        | 9              |           |
|                                                                                                                                                                                                   | Decreasing                                                                                                                                                      | 4.17%         | 1              |           |
| 41. Within the next five years, in what therapeutic area do you anticipate the most potential for QSP modeling impact in your organization (select all that apply)?                               | Oncology                                                                                                                                                        | 62.50%        | 15             | 9         |
|                                                                                                                                                                                                   | Neuroscience                                                                                                                                                    | 33.33%        | 8              |           |
|                                                                                                                                                                                                   | Autoimmune disorders                                                                                                                                            | 62.50%        | 15             |           |
|                                                                                                                                                                                                   | Infectious diseases                                                                                                                                             | 12.50%        | 3              |           |
|                                                                                                                                                                                                   | Cardiovascular                                                                                                                                                  | 25.00%        | 6              |           |
|                                                                                                                                                                                                   | Metabolic disorders                                                                                                                                             | 25.00%        | 6              |           |
|                                                                                                                                                                                                   | Rare diseases                                                                                                                                                   | 29.17%        | 7              |           |
|                                                                                                                                                                                                   | Other                                                                                                                                                           | 29.17%        | 7              |           |
|                                                                                                                                                                                                   | None                                                                                                                                                            | 0.00%         | 0              |           |
| 42. What cross-functional training opportunities are planned for all modelers (including QSP modelers, PKPD modelers, statisticians, etc. ) in your organization (please select up to 5 answers)? | Mathematics, statistics, engineering, or physics concepts (e.g., nonlinear dynamics, control theory, etc.)                                                      | 45.83%        | 11             | 9         |
|                                                                                                                                                                                                   | Relevant biological/physiological/pathological pharmacological systems                                                                                          | 58.33%        | 14             |           |
|                                                                                                                                                                                                   | Soft skills such as communication, project management, leadership, etc.                                                                                         | 58.33%        | 14             |           |
|                                                                                                                                                                                                   | Systems biology/physiology, PBPK/PD, pop PK/PD                                                                                                                  | 62.50%        | 15             |           |
|                                                                                                                                                                                                   | General ODE- or PDE-based computational modeling concepts                                                                                                       | 29.17%        | 7              |           |
|                                                                                                                                                                                                   | Other types of computational models (e.g., (fuzzy) logic models, agent-based models, etc.)                                                                      | 4.17%         | 1              |           |
|                                                                                                                                                                                                   | Information on “big data” or machine learning methods (e.g., Bayesian networks, artificial neural networks, deep learning, support vector machines, clustering) | 16.67%        | 4              |           |
|                                                                                                                                                                                                   | Coding languages or software development                                                                                                                        | 33.33%        | 8              |           |
|                                                                                                                                                                                                   | Optimization/calibration/verification techniques for complex systems                                                                                            | 12.50%        | 3              |           |
|                                                                                                                                                                                                   | <i>In vivo</i> or <i>in vitro</i> experimental skills                                                                                                           | 4.17%         | 1              |           |
|                                                                                                                                                                                                   | Other                                                                                                                                                           | 4.17%         | 1              |           |
|                                                                                                                                                                                                   | Not sure                                                                                                                                                        | 12.50%        | 3              |           |
|                                                                                                                                                                                                   | None                                                                                                                                                            | 0.00%         | 0              |           |

Response (%) =  $100\% \times [\# \text{ of Responses}] \div (33 - [\# \text{ Skipped}])$ , where 33 is the total number of survey participants. In other words, “Responses (%)” are calculated based on the number of responses divided by the number of responders to any given question.
