# Supplementary material for: Preclinical QSP Modeling in the Pharmaceutical Industry: An IQ Consortium Survey Examining the Current Landscape
Source: PubMed Central journal article supplement — CPT Pharmacometrics Syst Pharmacol. 2018 Feb 1;7(3):135–46. doi: 10.1002/psp4.12282 (PMC5869550; doi:10.1002/psp4.12282), 2018-02-01
Supplement: PSP4-7-135-s002.pdf [file PSP4-7-135-s002.pdf]

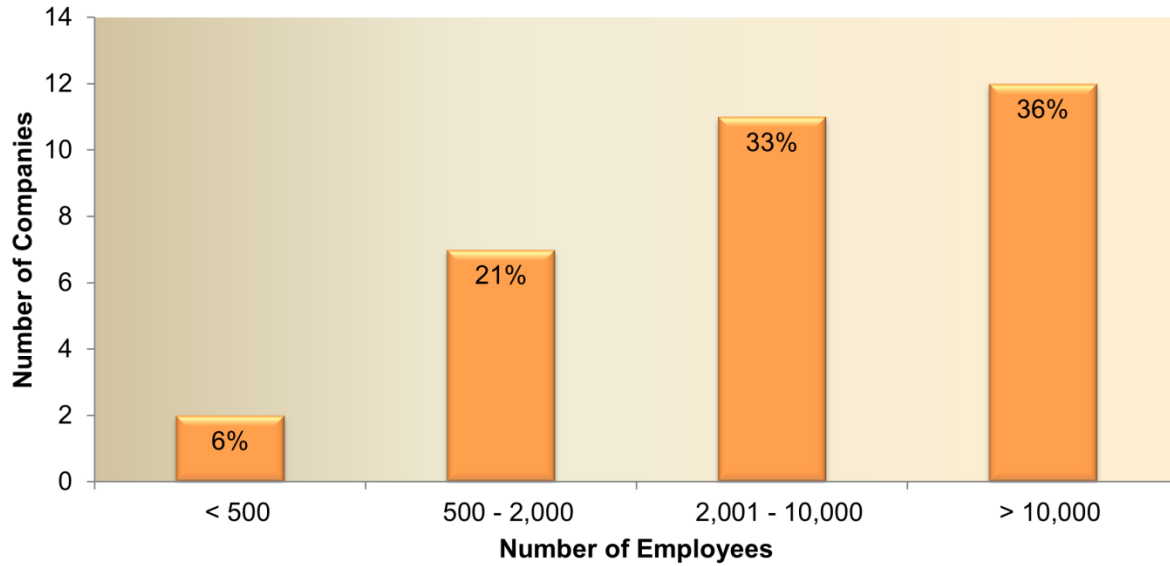

**Figure S1. Size Distribution of Companies Participating in the Survey**

The companies that responded are grouped based on number of employees as large (>10,000 employees), medium (2001-10000 employees), small (500-2000 employees) and very small (<500 employees). Percentages of companies in each group are calculated from the total number of survey participants (33). One participant did not specify the company size and is not shown in the plot.
