# Supplementary material for: Preclinical QSP Modeling in the Pharmaceutical Industry: An IQ Consortium Survey Examining the Current Landscape
Source: PubMed Central journal article supplement — CPT Pharmacometrics Syst Pharmacol. 2018 Feb 1;7(3):135–46. doi: 10.1002/psp4.12282 (PMC5869550; doi:10.1002/psp4.12282), 2018-02-01
Supplement: PSP4-7-135-s003.pdf [file PSP4-7-135-s003.pdf]

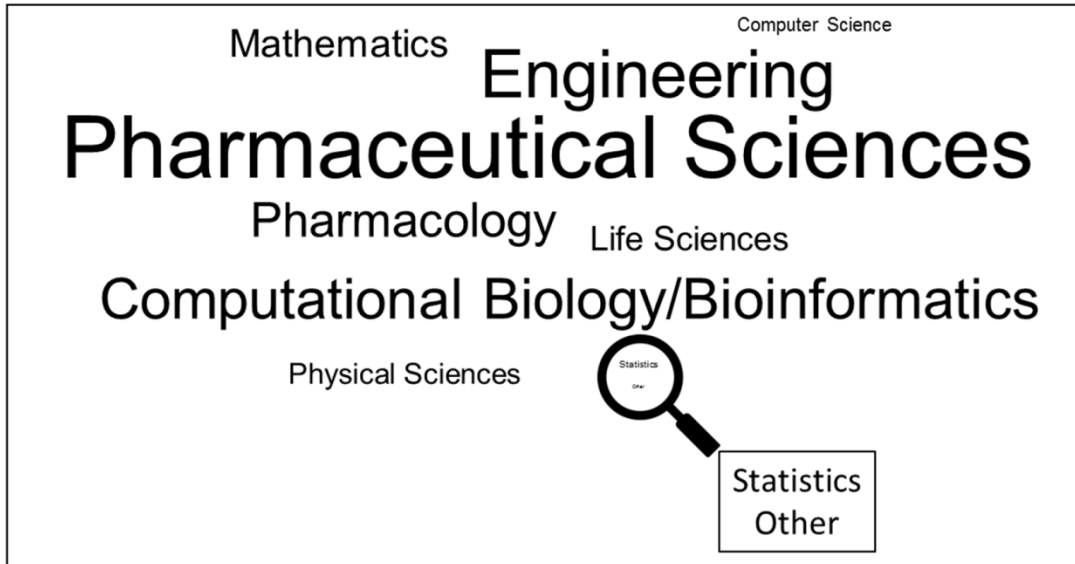

**Figure S2. Disciplines Contributing to QSP Modeling**

The font size of the discipline name represents the number of responses for a given discipline. The figure illustrates that the majority of QSP modelers have Pharmaceutical Sciences backgrounds, followed by Engineering and then Computational Biology/Bioinformatics.
