# Supplementary material for: Preclinical QSP Modeling in the Pharmaceutical Industry: An IQ Consortium Survey Examining the Current Landscape
Source: PubMed Central journal article supplement — CPT Pharmacometrics Syst Pharmacol. 2018 Feb 1;7(3):135–46. doi: 10.1002/psp4.12282 (PMC5869550; doi:10.1002/psp4.12282), 2018-02-01
Supplement: PSP4-7-135-s004.pdf [file PSP4-7-135-s004.pdf]

### a. Methods to Share QSP Models

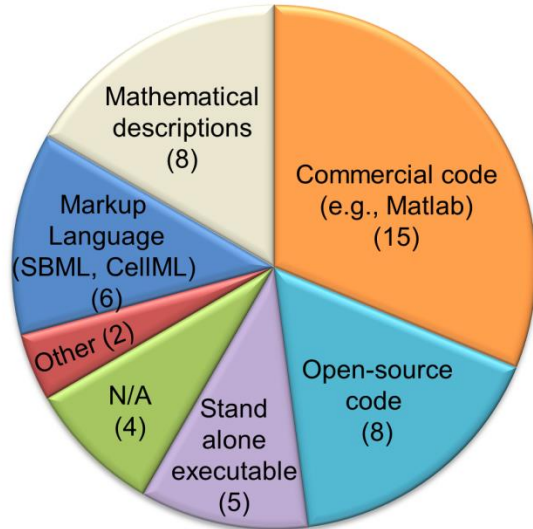

### b. Software Tools

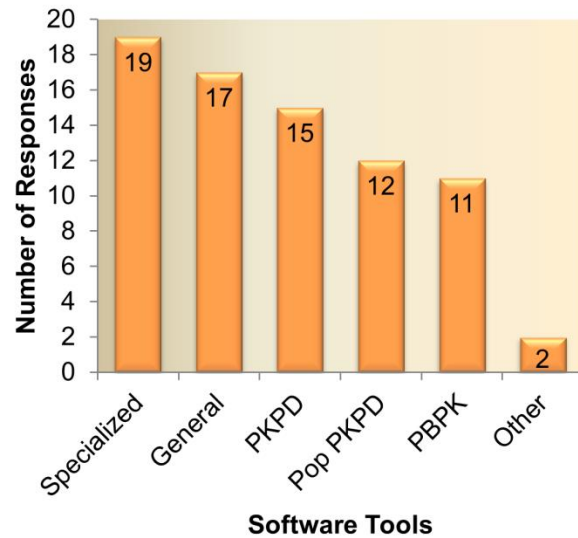

**Figure S3. QSP Model Sharing and Software Tools**

**(a)** Values represent the number of responses in each category. N/A: defined as “Not applicable (company does not share QSP models)”; **(b)** Software tools used for QSP modeling. Formal definitions of the headings are provided below.

- **Specialized** systems biology/physiology/pharmacology toolbox/software or markup languages (e.g., MATLAB® SimBiology®, Entelos PhysioLab®, Immunetrics Biosimulation Platform/Aegis, DBSolveOptimum, JDesigner, Bayer’s MoBi®, etc.)
- **PBPK** software tools (e.g., Simcyp®, GastroPlus, Bayer’s PK-Sim®)
- **PK/PD** modeling tools (e.g., Phoenix® WinNonlin®, Berkeley Madonna, SAAM II, ADAPT5)
- **Population PK/PD** modeling tools (e.g., Phoenix® NLME, NONMEM®, Monolix®, etc.)
- **General** engineering, computational or statistical languages/tools (e.g., MATLAB®, Mathematica®/SystemModeler, C/C++, Java, Python®, FORTRAN, R, SAS®, SPlus®, etc.)
