# Supplementary material for: Preclinical QSP Modeling in the Pharmaceutical Industry: An IQ Consortium Survey Examining the Current Landscape
Source: PubMed Central journal article supplement — CPT Pharmacometrics Syst Pharmacol. 2018 Feb 1;7(3):135–46. doi: 10.1002/psp4.12282 (PMC5869550; doi:10.1002/psp4.12282), 2018-02-01
Supplement: PSP4-7-135-s005.pdf [file PSP4-7-135-s005.pdf]

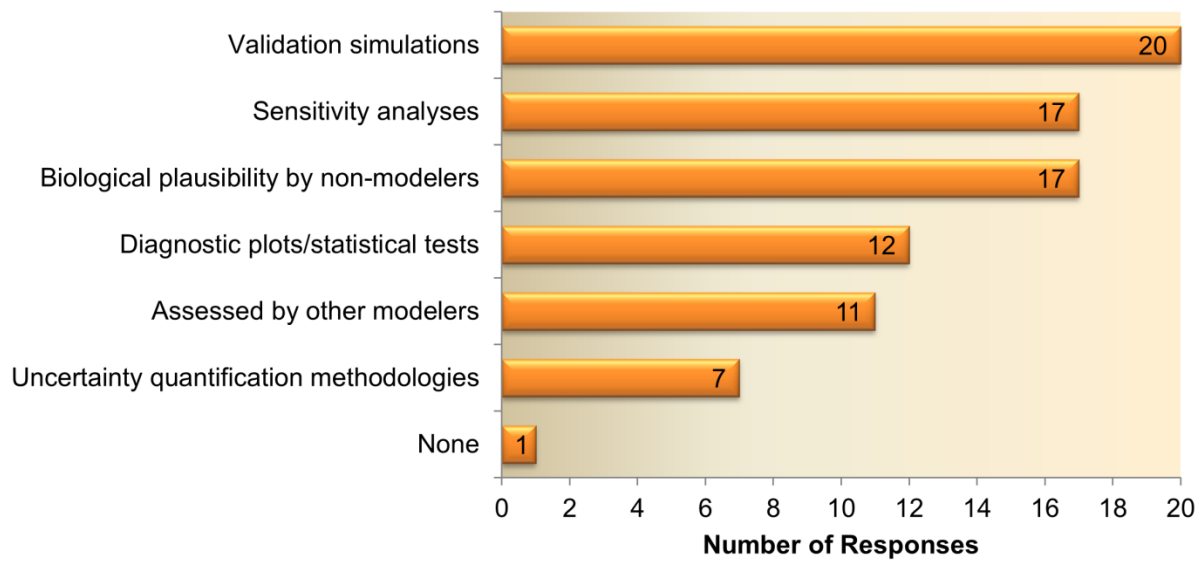

**Figure S4. Methods to Assess QSP Model Quality or Reliability**

A variety of approaches are used to assess model quality, with no clearly preferred method for QSP models.
