# Supplementary material for: Preclinical QSP Modeling in the Pharmaceutical Industry: An IQ Consortium Survey Examining the Current Landscape
Source: PubMed Central journal article supplement — CPT Pharmacometrics Syst Pharmacol. 2018 Feb 1;7(3):135–46. doi: 10.1002/psp4.12282 (PMC5869550; doi:10.1002/psp4.12282), 2018-02-01
Supplement: PSP4-7-135-s006.pdf [file PSP4-7-135-s006.pdf]

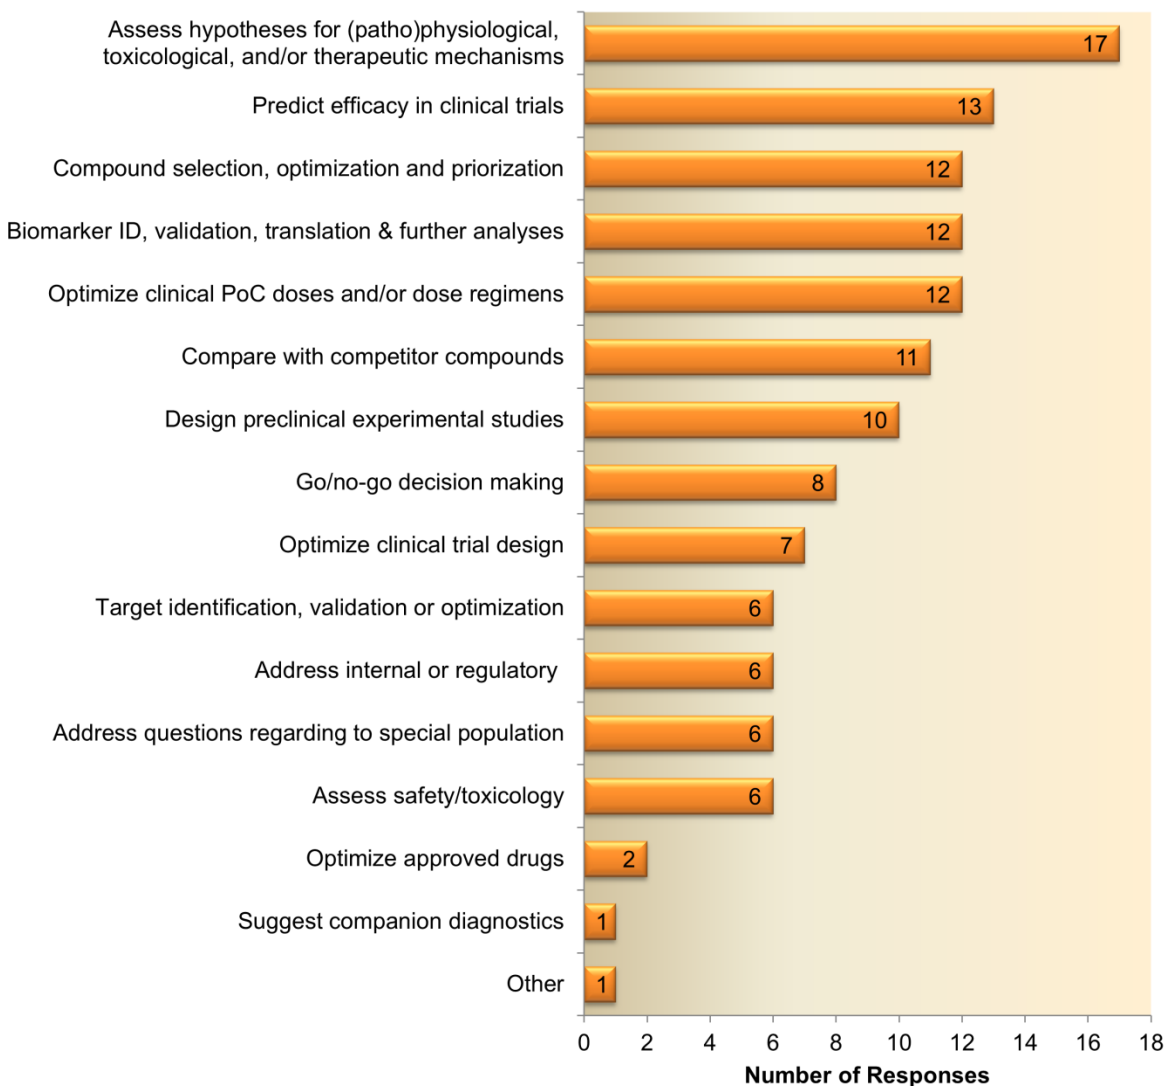

**Figure S5. Preclinical QSP Modeling Applications**

Results illustrate the diversity of applications for QSP modeling in the pharmaceutical industry, with most common use in hypothesis assessment, prediction of clinical efficacy, optimization of clinical PoC dose/regimen, compound selection and biomarker ID/translation.
