# Supplementary material for: Preclinical QSP Modeling in the Pharmaceutical Industry: An IQ Consortium Survey Examining the Current Landscape
Source: PubMed Central journal article supplement — CPT Pharmacometrics Syst Pharmacol. 2018 Feb 1;7(3):135–46. doi: 10.1002/psp4.12282 (PMC5869550; doi:10.1002/psp4.12282), 2018-02-01
Supplement: PSP4-7-135-s007.pdf [file PSP4-7-135-s007.pdf]

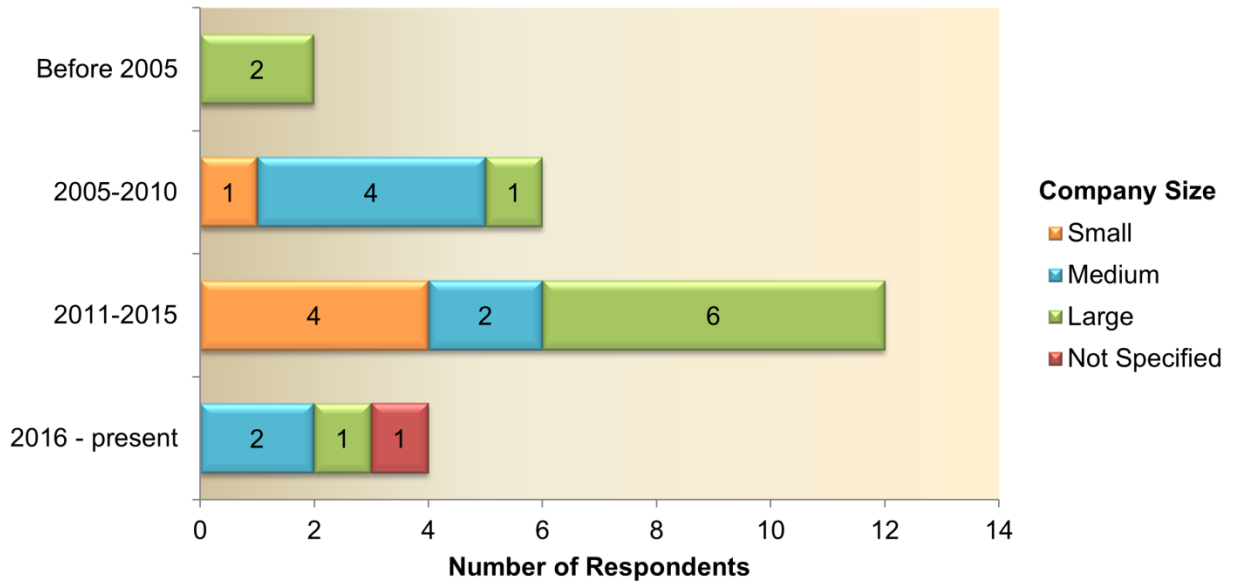

**Figure S6. Year QSP Initiated**

The majority of respondents initiated QSP modeling between 2011 – 2015, while two large companies began prior to 2005. Four companies are relatively new to QSP modeling, starting no sooner than 2016. Company size is defined as follows: Small = < 2,000 employees, Medium = 2,000 – 10,000; large = > 10,000 employees.
